# Supplementary material for: Mechanosensitive Kinases Regulate Stiffness-Induced Cardiomyocyte Maturation
Source: PubMed Central journal article supplement — Sci Rep. 2014 Sep 19;4:6425. doi: 10.1038/srep06425 (PMC4168277; doi:10.1038/srep06425), 2014-09-19
Supplement: srep06425-s3.pdf [file srep06425-s3.pdf]

**Mechanosensitive Kinases Regulate Stiffness-Induced Cardiomyocyte  
Maturation**

Jennifer L. Young<sup>a</sup>, Kyle Kretchmer<sup>a</sup>, Matthew G. Ondeck<sup>c</sup>, Alexander C. Zamboni<sup>b</sup>  
and Adam J. Engler<sup>a,c,d\*</sup>

Departments of <sup>a</sup>Bioengineering, <sup>b</sup>Pharmacology, and <sup>c</sup>Material Science Program;  
University of California, San Diego, CA 92093

<sup>d</sup>Sanford Consortium for Regenerative Medicine, La Jolla, CA 92037

**Subject Areas:** Mechanotransduction, Extracellular Matrix

**Correspondence:**

\*address for corresponding author:

Adam J. Engler

9500 Gilman Drive

MC 0695

La Jolla, CA 92093-0695

[aengler@ucsd.edu](mailto:aengler@ucsd.edu)

Phone: 858-246-0678

Fax: 858-534-5722

## Supplemental Information

### Supplemental Figures

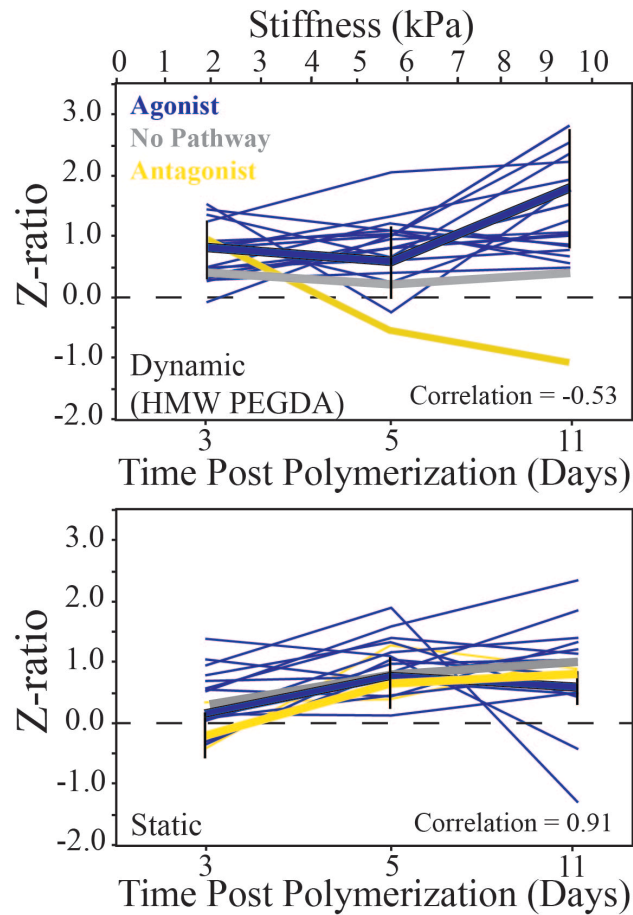

**Figure S1:** *Agonist and Antagonist Protein Expression Track with Time and Stiffness*

Agonist (blue) and antagonist (yellow) expression as a function of time and stiffness on dynamic HA hydrogels (top) and static 11kPa PA hydrogels (bottom). The gray line is an average of all proteins z-ratios not identified as agonists or antagonists. Correlation coefficient is calculated for agonist vs. antagonist, with a negative correlation on dynamic hydrogels (-0.53) and a positive correlation on static hydrogels (0.91).

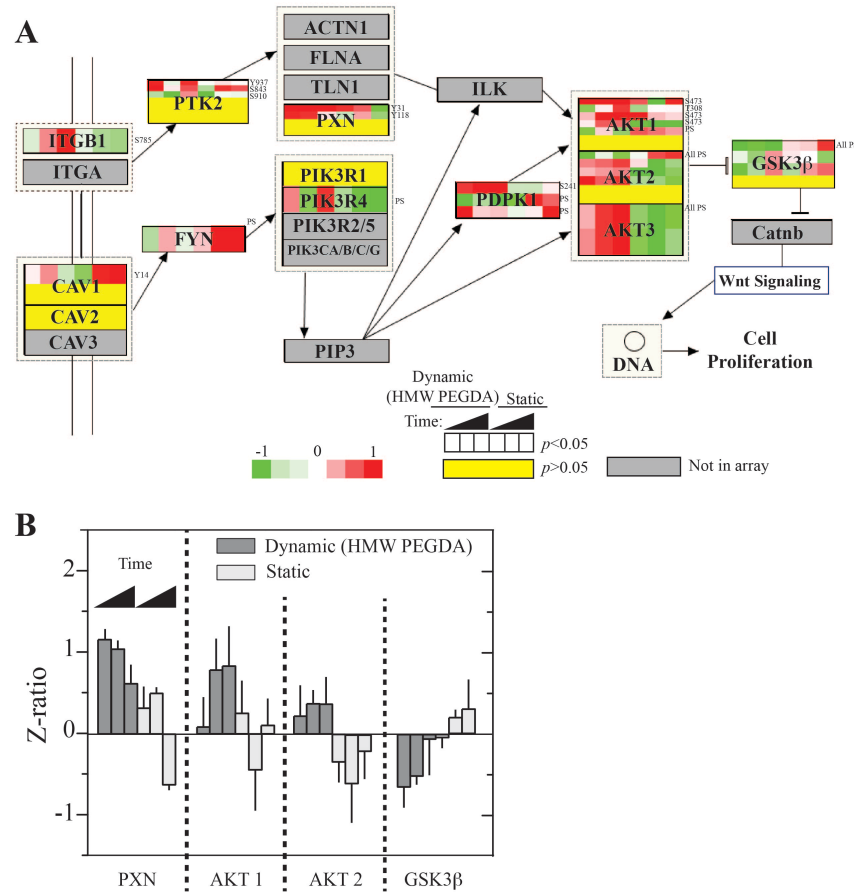

**Figure S2: Focal Adhesion Signaling is Substrate Stiffness-Dependent (A)** A focused view of Figure 4 depicting specific pathways of the focal adhesion signaling WikiPathway, identified by GO-ELITE analysis of microarray data, is shown. For genes with interaction  $p < 0.05$ , protein boxes were divided into 6 smaller boxes indicating z-ratios from 3, 5 and 11 days in culture compared to cells initially cultured for 1 day (left to right) for dynamic HMW PEGDA/HA (left three boxes) and static 11kPa PA (right three boxes). Rows within each box indicate different antibodies used for each target. For proteins with interaction  $p > 0.05$ , boxes were shaded yellow. For proteins not included in the array, the protein boxes are shaded grey. The color map indicates down-regulation (-1, green), no change with respect to the global average (0, white) and upregulation (+1, red). Phosphorylated site is denoted for each antibody. (B) Average expression and/or phosphorylation from multiple antibodies displayed (A) for paxillin (PXN), AKT1, AKT2 and GSK3 $\beta$  on dynamic HMW PEGDA/HA (dark grey) and static 11kPa PA (light grey). Note that averages include all antibodies for a protein, irrespective

of significance between materials or time.

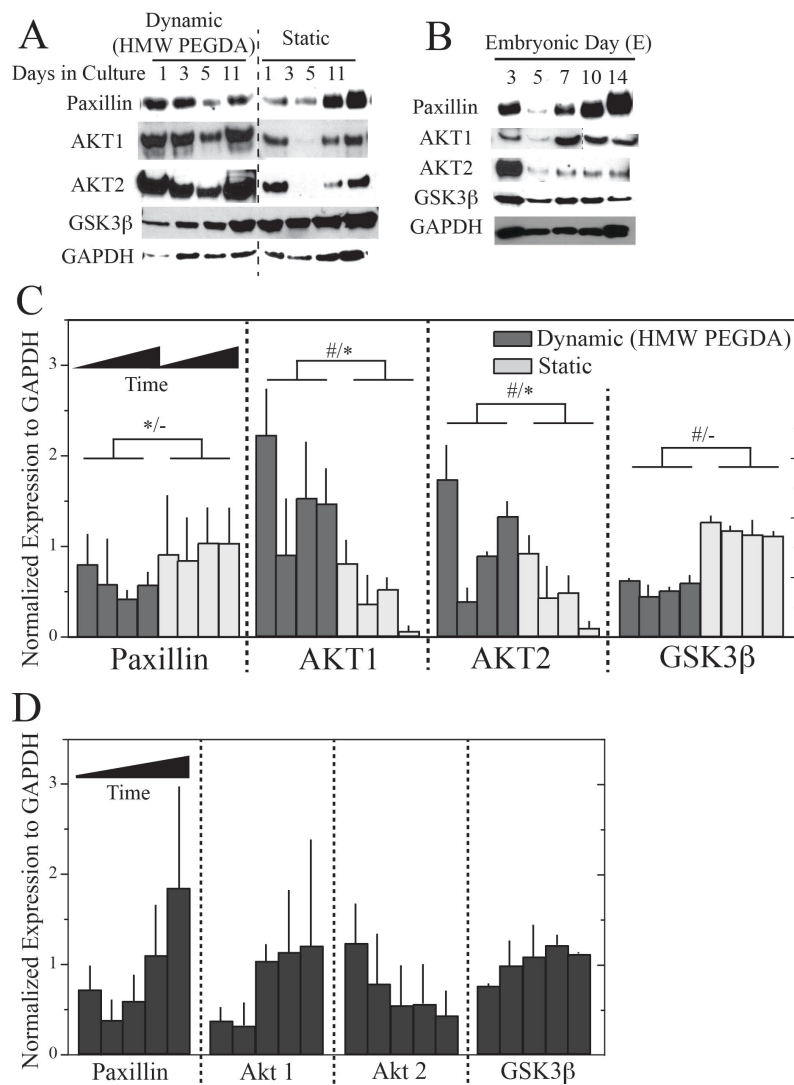

**Figure S3: Microarray Validation for Select Focal Adhesion and Signaling Proteins**

(A) Representative western blots for paxillin, AKT 1, AKT 2, GSK3β and GAPDH for dynamic HA and static 11kPa PA hydrogels over 1, 3, 5, 11 days after plating. (B) Representative western blots for paxillin (PXN), AKT 1, AKT 2, GSK3β and GAPDH for chicken lysates at 72, 120, 168, 240, 312 and 336 HPF. (C) Western blot data quantified for dynamic HMW PEGDA/HA (dark grey) and static 11kPa PA (light grey) hydrogels with the same time course as indicated in panel A, which increases to the right as indicated. Significance was determined via 2-way ANOVA as indicated by material  $p$ -value/time  $p$ -value. \* $p < 0.05$ , # $p < 10^{-3}$ . ‘-’ indicates no significance. (D) Western blot data

quantified for chicken lysates with the same time course as indicated in panel B, which increases to the right as indicated. All western blots were performed in triplicate.

## Supplemental Tables

### Supplemental Table 1: *Protein Kinases Microarray Indicate Cardiac Agonist and Antagonists*

The data in this table corresponds to the cluster image shown in Figure 3 of the 199 unique proteins that were found to have statistically significant changes in expression or phosphorylation over time and between hydrogels types based on 2-way ANOVA analysis of their z-ratios. Note that only data with a z-ratio greater than 1 or less than -1, i.e. proteins with significant expression or phosphorylation changes, are displayed here; this eliminated 56 unique measures that had statistically significant changes where z-ratios were greater than 1 or less than -1 (these data are used in Figure 4 for GO mapping). All z-ratios have been computed relative to 72 HPF cells cultured for 1 day on a matrix identical to the condition being tested. The boundaries denoted by the thick black lines correspond to the white lines in Figure 3. Agonists are highlighted in blue and antagonists in yellow. Antibodies recognizing phosphorylation sites are specifically noted with the site and type of phosphorylation in the name column.

| Name              | Z-ratio vs. day 1 |           |          |           |           |           |
|-------------------|-------------------|-----------|----------|-----------|-----------|-----------|
|                   | HA                |           |          | 11 kPa PA |           |           |
|                   | D3                | D5        | D11      | D3        | D5        | D11       |
| RIPK1             | 3.118561          | 1.41393   | 3.460529 | 1.302378  | 1.178256  | -0.056596 |
| Paxillin 1:Y31    | 1.41654           | 1.268163  | 1.087366 | 0.842122  | 0.635712  | -0.754733 |
| PKBa (Akt1): S473 | 0.264489          | 0.965528  | 1.06965  | 1.111093  | 0.264182  | 0.1588    |
| PKBa (Akt1): S473 | 1.229188          | 2.038357  | 2.217376 | 0.661501  | -1.260495 | 0.894316  |
| Acetylated Lysine | 1.44282           | 1.304733  | 1.770655 | 1.116746  | -0.506789 | -0.031211 |
| Hsp70             | 1.541007          | 1.037319  | 1.107019 | 1.150081  | -0.562886 | -0.493094 |
| PAK1/2/3          | 0.776104          | 1.06329   | 1.04998  | 1.172034  | -1.184353 | -0.623856 |
| CaMK4             | 0.779123          | 1.324707  | 0.95634  | 0.931652  | -1.019233 | -0.319275 |
| CASP5             | 0.598107          | 1.028487  | 0.994088 | 0.390919  | -0.728146 | -0.041321 |
| CaMK4             | 0.495511          | 1.22562   | 0.834609 | 0.411212  | -0.706381 | -0.243526 |
| CaMKK(2)          | 0.943849          | 0.248911  | 1.263717 | -0.984113 | 0.527364  | 0.127558  |
| CAMK2d            | 1.523365          | -0.229242 | 1.811499 | -0.72495  | -0.347124 | 0.260349  |
| BRD2              | 1.136803          | 0.054021  | 1.203891 | -0.452536 | -0.653066 | -0.326928 |
| Erk4              | 1.107361          | 0.055422  | 1.394372 | -0.630889 | -0.118246 | -0.334087 |

|                          |          |           |          |           |           |           |
|--------------------------|----------|-----------|----------|-----------|-----------|-----------|
| PAK1/2/3: (S144/141/154) | 0.948263 | 0.369127  | 1.066551 | -0.690516 | -0.095569 | -0.345316 |
| Plk3                     | 0.672003 | -0.134462 | 1.005197 | -0.083173 | -0.03673  | -0.608942 |
| FKHRL1: T32              | 1.455873 | -0.416982 | 0.932408 | -0.063484 | 0.080064  | -0.251109 |
| Jun: S73                 | 0.842453 | 0.095988  | 1.675553 | -0.063109 | -0.22174  | 0.298127  |
| DRAK2                    | 0.459267 | 0.794971  | 1.376504 | -0.274393 | 0.076223  | -0.41308  |
| PDK1: S241               | 0.803476 | 1.024977  | 2.820525 | -0.219629 | -0.229376 | 0.072734  |
| CASK/Lin2                | 1.022953 | 2.045698  | 0.802445 | -0.505226 | -1.15088  | 0.438138  |
| CASP4                    | 0.295283 | 1.221252  | 0.786617 | -0.601213 | -0.465674 | 0.522222  |
| TTK                      | 1.321602 | 0.471881  | 0.869861 | -0.57012  | -1.146624 | 0.306811  |
| Hsp90a/b                 | 1.085824 | 0.564965  | 0.41566  | -0.255948 | -0.798461 | 0.078978  |
| MAPKAPK2a+b: T334        | 0.48936  | 0.587282  | 1.482418 | 0.193866  | -0.157672 | -1.362849 |
| MLC(MLRC2): S19          | 0.665943 | 0.120591  | 0.966125 | 0.626417  | -0.280281 | -1.162283 |
| DNAPK                    | 0.104506 | -0.319912 | 1.019119 | -0.272631 | -0.630259 | -0.405866 |
| PI3KR4                   | 0.48408  | -0.59191  | 0.84015  | -0.354578 | -0.830465 | -1.030824 |
| LOK                      | 0.457298 | -0.241554 | 0.909654 | -0.0935   | -0.809914 | -1.021077 |
| PSD-95                   | 0.578636 | -0.102043 | 0.673613 | -0.234534 | -0.58851  | -1.04871  |
| Src                      | 0.725509 | -0.368572 | 0.678135 | 0.117391  | -1.029744 | -1.218583 |
| RSK2                     | 0.362122 | -0.423058 | 0.574849 | -0.365098 | -0.894501 | -1.420319 |
| Aurora A (AIK)           | 0.303025 | 0.054139  | 1.08098  | -0.294044 | -1.32332  | -0.609501 |
| Hsp90a/b                 | 1.565056 | 0.720446  | 1.484229 | -0.579676 | -1.711245 | -1.567809 |
| CAMK2g                   | 1.364879 | 0.650535  | 2.377233 | -1.607255 | -1.652867 | -1.193594 |
| Axl                      | 0.810166 | 0.65317   | 1.048305 | -0.954094 | -0.670458 | -0.814457 |
| LATS1                    | 0.537874 | 0.068121  | 1.316567 | -0.925545 | -1.317764 | -1.450028 |
| STK33                    | 0.295381 | 0.277942  | 0.707861 | -0.505754 | -1.148913 | -0.95651  |
| CDK10                    | 0.516296 | 0.140963  | 0.40281  | -0.91955  | -1.204346 | -1.085317 |
| PKBg (Akt3)              | 0.452398 | 0.811281  | 1.052166 | -0.596686 | -0.954137 | -0.432973 |
| PKBg (Akt3)              | 0.313189 | 0.815993  | 1.018104 | -0.526271 | -1.053984 | -0.648539 |
| PKA R2a: S99             | 0.372615 | 0.891271  | 1.262279 | -0.284347 | -1.469272 | -1.207878 |
| TAK1                     | 0.318886 | 0.964627  | 1.149757 | -0.023813 | -0.648555 | -0.518719 |
| PKCb2                    | 0.37785  | 0.805038  | 1.53164  | -0.210172 | -0.973237 | -0.87325  |
| PKBb (Akt2)              | 0.485591 | 0.593907  | 0.779685 | 0.137288  | -1.237538 | -0.425113 |
| PKCa: S657               | 0.032825 | 0.7158    | 0.36242  | -0.741567 | -1.308193 | -1.092303 |
| Striatin                 | 0.399507 | 0.992305  | 0.291171 | -0.636113 | -1.12192  | -1.080082 |
| SLK                      | 0.516777 | 0.238874  | 0.459154 | -0.168609 | -1.14005  | -1.108244 |
| p38a MAPK: (T180+Y182)   | 0.575381 | 0.733064  | 0.238724 | -0.237214 | -1.398244 | -1.46398  |
| Smac/DIABLO              | 0.587405 | -0.038214 | 0.010419 | -0.157447 | -0.944491 | -1.053084 |



|                        |           |           |           |           |           |           |
|------------------------|-----------|-----------|-----------|-----------|-----------|-----------|
| PACSIN1                | 0.514819  | 0.300631  | 0.106391  | -0.601623 | -0.727706 | -1.495214 |
| PKBb (Akt2)            | 0.276853  | 0.391034  | 0.491596  | -1.018768 | -1.401298 | -0.554514 |
| CDC2L5 (CHED)          | 0.281433  | 0.403158  | 0.368731  | -1.085769 | -0.963701 | -0.439058 |
| PARP1                  | 0.990711  | 0.570212  | 0.938939  | -0.978055 | -0.268624 | -1.21526  |
| p53: S392              | 1.006419  | 1.736152  | 1.023852  | -1.248786 | -0.200012 | -1.100283 |
| DAPK1                  | 0.491915  | 0.665172  | 0.506557  | -1.140837 | -0.202872 | -0.791534 |
| Hsp70                  | 1.185353  | 0.794187  | 1.056422  | -0.111991 | -0.442507 | -1.282293 |
| Tau: S519              | 1.297463  | 0.657086  | 0.3599    | -0.331313 | -0.419152 | -1.114111 |
| p38a MAPK              | 0.857238  | 1.100944  | 0.877293  | -0.221055 | -0.027737 | -0.553582 |
| p38a MAPK: (T180+Y182) | 0.919623  | 1.0269    | 0.672235  | -0.114266 | -0.451576 | -0.613434 |
| p38a MAPK              | 1.446649  | 1.104376  | 0.557517  | -0.594791 | 0.011412  | -0.718936 |
| Histone H3: S11        | 1.117656  | 0.788326  | 0.682093  | 0.370793  | -0.249005 | -0.709561 |
| DNAPK                  | 1.728067  | 0.597896  | 0.024918  | -0.976747 | -0.300776 | -1.194556 |
| Cyclin D1              | 1.512635  | 0.608261  | -0.408179 | -0.798171 | 0.119052  | -1.00741  |
| Tau: S717              | 1.016748  | 0.511381  | 0.29606   | 0.279633  | -0.965381 | -0.871309 |
| STAT5A: S780           | 0.744842  | 1.117934  | 0.160584  | 0.836651  | -0.731099 | -0.953199 |
| p38a MAPK              | 0.448033  | 0.689392  | 0.101709  | 0.489351  | -1.113249 | -1.142935 |
| p38a MAPK              | -0.080375 | 1.008698  | 0.409135  | 0.387138  | -0.123883 | -0.847004 |
| NFkappaB p65: S276     | 0.207677  | -0.243458 | 1.13438   | 0.706522  | -0.840447 | -0.414968 |
| Tau: T522              | 0.320528  | 0.054567  | 0.62102   | 0.843564  | -1.034836 | -0.819794 |
| S6Kb1: T252            | -0.138331 | 0.297189  | 0.472441  | 0.3297    | -1.232425 | -0.882128 |
| Crystallin aB: S19     | -0.677603 | -0.186794 | 0.47217   | -0.089992 | -1.506035 | -1.612321 |
| MEKK4 (MAP3K4)         | -0.034323 | -0.446795 | 0.144932  | 0.971659  | -1.564642 | -0.732007 |
| MEK5 (MAP2K5)          | -0.171479 | -0.428684 | 0.140558  | 0.258188  | -1.524946 | -0.785424 |
| MEKK1 (MAP3K1)         | -0.196334 | -0.557563 | -0.080015 | 0.330578  | -1.457612 | -0.572964 |
| B23 (NPM): T199        | -0.745112 | -0.862645 | 1.004867  | 1.024493  | -0.671971 | 0.364066  |
| CK1g2                  | 0.93041   | 0.155272  | -0.116395 | -0.760403 | -1.019973 | -0.459042 |
| HspBP1                 | 1.444564  | 1.41566   | -1.327759 | -1.361431 | -1.661153 | -1.431718 |
| p73                    | 0.17493   | -0.482951 | -1.669515 | 0.021272  | -1.838897 | -1.257993 |
| DFP45 + DFP35          | -0.632077 | 0.190245  | -0.659683 | -1.860874 | -0.921992 | -0.788212 |
| Tau: S516+S519         | 1.159635  | 1.36147   | -0.588396 | 0.567417  | -0.486393 | -0.324366 |
| p38a MAPK: T180+Y182   | 0.433488  | 1.117919  | -1.347307 | 1.760173  | -0.982249 | 0.833823  |
| ROKa (ROCK2)           | 1.972204  | -0.989057 | -1.407477 | 1.413432  | -1.307096 | 1.301044  |
| 4E-BP1                 | 1.025276  | 0.004168  | 0.471921  | 1.499449  | 0.272316  | -0.396939 |
| PDK1                   | 1.218788  | 0.187133  | 0.238844  | -0.081323 | 0.074075  | 0.936769  |
| Erk5: T218+Y220        | 1.367647  | -0.781281 | 0.63823   | 1.316673  | 1.402561  | 1.261759  |

|                     |           |           |           |           |           |          |
|---------------------|-----------|-----------|-----------|-----------|-----------|----------|
| Ksr1                | 0.842898  | 0.840624  | 0.550829  | -0.037351 | 1.044453  | 0.390595 |
| Lck                 | 0.757186  | 0.444438  | 0.876175  | -0.247151 | 1.716076  | 0.192929 |
| MEK6 (MAP2K6)       | 1.614992  | -0.151231 | 0.849289  | -0.100568 | 1.364647  | 0.21265  |
| PKR1: T451          | 0.364637  | 0.033185  | -0.979673 | -0.369043 | 1.992409  | -0.42783 |
| MKP1                | -0.836143 | -0.133765 | -0.146683 | 0.035132  | -1.06497  | 1.232768 |
| ZAP70               | -0.061521 | -0.203611 | -0.609243 | 0.042182  | -0.18419  | 1.393055 |
| APG2                | 0.150294  | -0.472691 | -0.299352 | 0.116513  | 0.237445  | 1.321845 |
| Bid                 | -0.671042 | 0.532931  | 0.12821   | 0.192042  | 0.510321  | 1.993602 |
| Cdc25C: S216        | 0.258885  | 0.646374  | 0.22615   | 0.101978  | 0.556267  | 2.556052 |
| Hsc70               | -0.057588 | 0.368266  | -0.082892 | 0.080845  | 0.336476  | 1.214685 |
| PITSLRE             | -0.146578 | 1.225894  | 0.417843  | 0.378211  | 1.087375  | 1.93692  |
| Hsp60               | 0.210503  | 0.976806  | 0.224738  | 0.485401  | 0.330767  | 1.349873 |
| PKC <i>ι</i> : T564 | 0.260779  | 0.502538  | -0.88319  | -0.608357 | 0.650599  | 1.787113 |
| Caveolin 1: Y14     | 0.061818  | 0.449019  | -0.226282 | -0.559367 | 0.901969  | 1.739942 |
| CASP7               | 0.444569  | 0.5958    | 0.008601  | -0.352635 | 0.21982   | 1.172298 |
| IRAK1               | 0.073512  | 1.081855  | 0.885188  | -0.622458 | 0.52171   | 1.573068 |
| CASP9               | -0.009595 | 0.408844  | 0.365617  | -0.561613 | -0.070947 | 1.21751  |
| CDK1 (CDC2)         | 0.043758  | 1.29544   | 0.234885  | -0.034385 | 0.260234  | 0.672023 |
| CDK6                | -0.434431 | -0.863763 | -0.718763 | 0.352504  | 1.744787  | 2.415047 |
| Lck                 | -0.524246 | 0.116391  | -1.183648 | 0.45455   | 2.305449  | 1.799592 |
| CAMK1a              | -0.151746 | 0.037172  | -0.043639 | 0.310736  | 1.487269  | 2.336935 |
| AIF                 | -0.387123 | -0.011213 | -0.685952 | 0.164083  | 1.489236  | 1.98385  |
| ACK1                | -0.125669 | 0.018257  | -0.623166 | 0.486812  | 1.519447  | 1.914611 |
| Mnk2                | -0.078268 | 0.156158  | -0.300941 | 0.392307  | 0.953456  | 1.30486  |
| MAPKAPK2            | -0.519881 | 0.341587  | -0.530013 | 0.591909  | 1.900478  | 1.880025 |
| Fyn                 | -0.326917 | 0.333247  | -0.10909  | 0.227629  | 1.481577  | 1.191292 |
| MEK5 (MAP2K5)       | -0.207637 | 0.127849  | -0.905763 | 0.97597   | 1.220942  | 1.371272 |
| CASP1               | -1.006798 | -0.390332 | -0.625822 | 1.006348  | 1.560494  | 1.588134 |
| CDK1 (CDC2)         | 0.059832  | 0.08199   | 0.396044  | -0.144604 | 1.225236  | 1.751633 |
| YSK1                | -0.40377  | -0.138005 | 0.337413  | -0.255201 | 1.02004   | 1.462446 |
| MEK3 (MAP2K3)       | 0.420992  | -0.298495 | -0.006241 | 0.243264  | 1.201852  | 1.845549 |
| Nlk                 | 0.375408  | 0.245514  | -0.008121 | 0.066984  | 0.741243  | 1.336288 |
| CDK1 (CDC2)         | -1.216324 | -0.097755 | 0.176882  | 0.146405  | 1.447098  | 2.697508 |
| CaMK1d              | -0.74525  | -0.024432 | 0.106416  | 0.501158  | 0.583972  | 1.089181 |
| PKC <i>δ</i>        | -0.876049 | -0.311605 | 0.422427  | 0.346629  | 0.219945  | 1.210451 |
| JNK1/2/3            | -1.452539 | -0.141892 | 0.215458  | 0.35837   | 1.29291   | 1.006271 |

|                          |           |           |           |           |           |           |
|--------------------------|-----------|-----------|-----------|-----------|-----------|-----------|
| KHS                      | -1.194769 | 0.072718  | -0.0909   | -0.602463 | 0.602155  | 1.69426   |
| CDK5                     | -0.81786  | -4.92E-04 | -0.148184 | -0.877076 | 1.007051  | 1.318459  |
| PAK2                     | -0.552638 | 0.353208  | -0.221834 | -0.404794 | 0.972517  | 1.082372  |
| Cyclin B1                | -1.487178 | -0.360937 | -0.85401  | -0.280898 | 1.645455  | 2.230759  |
| Ksr1                     | -0.98207  | 0.265598  | -0.546646 | -0.289714 | 1.000431  | 1.750282  |
| CDK2                     | -1.499435 | 0.079835  | -0.774513 | 0.44826   | 2.357549  | 1.964587  |
| PKC h: T655              | -1.186869 | 0.232441  | -0.906284 | -0.119242 | 1.020722  | 1.278831  |
| Plk2                     | -1.089996 | 0.318755  | -0.57791  | 0.113046  | 1.143469  | 1.212019  |
| DDIT3(CHOP)              | -1.356082 | 0.25179   | -0.52449  | 0.10793   | 1.085071  | 1.116675  |
| BMX (Etk): Y40           | -1.245008 | 0.448983  | -0.514794 | -0.104603 | 1.370643  | 0.908806  |
| MEK7 (MAP2K7)            | -1.302749 | -0.125739 | -1.479917 | 0.507675  | 1.199299  | 1.550629  |
| PAC1                     | -1.075421 | -0.218818 | -0.851956 | 0.076474  | 1.121872  | 1.046202  |
| GCK                      | -1.082652 | -0.406333 | -1.134822 | -0.017798 | 1.201981  | 0.911047  |
| ErbB2 (HER2)             | -1.391078 | -0.106752 | -1.732703 | 0.076242  | 1.227747  | 0.648536  |
| Tyk2                     | -1.153299 | 0.159261  | -1.284704 | -0.680616 | 0.897699  | 1.250663  |
| CDK1 (CDC2)              | -0.520045 | 0.404827  | -0.968281 | -0.196117 | 1.012198  | 0.857373  |
| Chk1                     | -0.861002 | 0.023662  | -0.551867 | 0.0076    | 0.201694  | 1.198285  |
| TBK1                     | -0.747377 | -0.050391 | -0.765219 | -0.622961 | 0.068058  | 1.006084  |
| Src                      | -0.350373 | 0.896066  | -0.017745 | -0.284935 | 1.49196   | 1.052773  |
| CDK2                     | -4.233369 | 1.74415   | -1.701654 | -0.519198 | 1.307565  | -0.838613 |
| ATF2                     | -0.364917 | -0.18171  | 0.033055  | 2.040451  | -0.217375 | 1.721937  |
| Arrestin b1              | -0.378173 | -2.953097 | -2.546699 | 2.098366  | -0.117612 | 1.608445  |
| MST1                     | -2.527446 | -2.072399 | -1.14156  | 2.662114  | 0.063739  | 2.006949  |
| Aurora A (AIK)           | -1.854017 | -1.7871   | -1.055906 | 0.874698  | 0.203757  | 1.981832  |
| MST1                     | -0.838552 | -0.484228 | -0.207971 | 0.491802  | 0.098773  | 1.060639  |
| Mnk1: T250+T255          | -1.678045 | -1.264944 | 0.054993  | 2.506058  | -0.441717 | 1.1486    |
| MKP2                     | -2.485517 | -1.802326 | -1.20783  | 2.305037  | -2.088473 | 0.438617  |
| MEK4 (MAP2K4): S257+T261 | -0.590291 | -0.659351 | -0.22697  | 1.016706  | -0.698462 | 0.226291  |
| MEK6 (MAP2K6):S207       | -0.761505 | -0.631656 | -0.520762 | 2.03918   | -0.966093 | 0.319338  |
| MEK3b (MAP2K3)           | -0.728759 | -0.485143 | -0.707002 | 2.757088  | 2.325353  | 1.804679  |
| Pyk2: Y579               | -1.45977  | -1.813892 | -0.387773 | 2.059047  | 1.397269  | 1.686875  |
| NMDAR2B:Y1474            | -0.821751 | -1.189606 | -0.55451  | 1.630476  | 0.572204  | 0.648914  |
| Pyk2: Y579               | -1.951041 | -1.474617 | -1.238349 | 3.531604  | 2.230718  | 0.988416  |
| ILK1                     | -0.543595 | -0.989285 | 0.789326  | 1.169073  | 2.010636  | 0.619987  |
| MST3                     | -0.810771 | -0.856942 | 0.691949  | 1.536015  | 1.186381  | 0.526412  |
| Smad2/3                  | -3.503268 | -2.395816 | -1.954583 | -0.71122  | 0.036338  | 1.613225  |

|                           |           |           |           |           |           |           |
|---------------------------|-----------|-----------|-----------|-----------|-----------|-----------|
| VEGFR2 (KDR):Y1214        | -1.679586 | -1.751728 | -0.87986  | 0.244951  | -0.039532 | 0.179672  |
| ZIPK                      | -1.022111 | -0.740629 | -1.61761  | -0.918463 | 0.822728  | 1.216546  |
| FasL                      | -1.867587 | -1.541067 | -1.609083 | -0.951751 | 1.395385  | 0.917357  |
| STAT6                     | -1.575446 | -1.300546 | -1.597811 | -0.547319 | 0.682964  | 0.363246  |
| PKCm (PKD)                | -1.370068 | -0.250952 | -1.239103 | -0.224799 | 0.806516  | 0.900827  |
| CK1d                      | -1.857824 | -0.459427 | -0.942899 | -0.593865 | 1.023619  | 0.658055  |
| PDK1                      | -1.832064 | -0.346846 | -1.264894 | -0.657584 | 0.893746  | 0.611151  |
| PKCb2                     | -1.154032 | -0.115537 | -0.622879 | -0.197305 | 0.224934  | 0.623178  |
| Mcl1                      | -1.319301 | -0.218202 | -0.971265 | -0.61945  | 1.424814  | 0.425025  |
| Abl                       | -1.399569 | -0.321737 | -2.307207 | 0.127413  | 0.670179  | 1.309879  |
| NFkappaB p65              | -1.057321 | -0.885754 | -2.051806 | 0.320045  | 0.761837  | 1.006974  |
| STAT5B                    | -2.272437 | -0.722978 | -2.952246 | 0.421225  | 0.985004  | 1.278741  |
| STAT3                     | -2.535036 | -0.999121 | -2.773464 | 0.175419  | 1.415979  | 1.269999  |
| STAT5A                    | -1.83704  | -0.832961 | -1.868501 | -0.235185 | 1.076075  | 0.634091  |
| STAT2                     | -2.419463 | -0.901293 | -3.996701 | -0.269609 | 0.902753  | 0.895227  |
| STAT4                     | -1.653014 | -0.653023 | -2.589441 | -0.137029 | 0.628782  | 0.794242  |
| Fos                       | -2.132183 | -1.270737 | -3.076954 | -0.569609 | 0.602799  | 0.753295  |
| NFkappaB p50              | -1.646434 | -0.781109 | -1.624122 | -0.227187 | 0.317804  | 0.732452  |
| GSK3a+b                   | -1.100833 | -0.763927 | -1.083164 | 0.140016  | 0.193573  | 0.82517   |
| Nek2                      | -0.662121 | -0.68675  | -1.107335 | 0.051373  | 0.082896  | 0.672394  |
| Trail                     | -2.74235  | -1.86363  | -3.648386 | 0.008781  | 0.172514  | 0.664456  |
| PAK1                      | -1.871039 | -1.185871 | -2.549705 | 0.032676  | -0.065148 | 0.296416  |
| PKCb1                     | -1.303128 | -0.730947 | -1.3375   | -0.09781  | -0.134037 | 0.277638  |
| Catenin b1                | -1.793364 | -1.119445 | -2.007365 | -0.268435 | -0.111805 | 0.217634  |
| STAT1a+b                  | -1.729214 | -1.294235 | -1.765104 | -0.119931 | 0.141772  | 0.152858  |
| PTEN                      | -0.987824 | -0.644651 | -1.215845 | -0.285324 | -0.232666 | 0.006768  |
| IkbA                      | -2.230398 | -0.713355 | -2.113096 | -0.103292 | -0.473585 | 0.115489  |
| PP2A/Ca+Cb                | -1.892122 | -1.419836 | -1.482832 | -1.508824 | 0.598088  | -0.322736 |
| PKCm (PKD): S738+S742     | -2.131156 | -1.222308 | -1.830782 | 0.887954  | 0.491858  | 0.251773  |
| PTP1D: S580               | -0.975557 | -0.971189 | -0.988516 | 1.150545  | 0.246225  | -0.240427 |
| PTP1C                     | -3.009337 | -2.472423 | -2.104736 | 2.531459  | 1.814942  | 0.060138  |
| Rac1: S71                 | -1.37083  | -1.245224 | -1.129863 | 1.258873  | 0.941889  | -0.744528 |
| PTP1B                     | -2.080339 | -1.793426 | -1.887101 | 0.031305  | 1.107104  | -0.101787 |
| Tyrosine Hydroxylase: S18 | -1.256523 | -1.111868 | -0.687271 | -0.132243 | 0.391533  | -0.169687 |
| Rb                        | -2.824816 | -2.666907 | -1.904764 | 1.054273  | 1.202195  | -0.625483 |
| Rac1                      | -2.590589 | -2.059583 | -2.651311 | 0.780016  | 1.835245  | -1.720305 |

|                        |           |           |           |          |          |           |
|------------------------|-----------|-----------|-----------|----------|----------|-----------|
| Raf1: S259             | -1.496093 | -1.064544 | -0.876762 | 0.717639 | 0.300768 | -1.026208 |
| IkBb                   | -0.72104  | 0.312734  | -1.713653 | 0.716927 | 0.958355 | 0.410461  |
| PKCq                   | 0.173988  | -0.74191  | -1.57076  | 0.611903 | 1.208336 | 0.203944  |
| Erk1 + Erk2: T185+Y187 | -1.166351 | -0.878663 | 0.636741  | -0.39176 | 0.854204 | 0.44973   |
| Rb: T356               | -0.466729 | -0.064906 | 0.422701  | 0.514812 | 1.0059   | -0.262417 |

## Supplemental Videos

**Supplementary Video 1:** *Calcium Imaging for Cells on Dynamic and Static Hydrogels After 1 and 11 Days in Culture.*

Representative cells undergoing calcium imaging shown in four culture conditions of 1) 72 HPF cells plated for 1 day on dynamic HMW HA hydrogels followed by 2) identical cells on static 11 kPa PA hydrogels, 3) 72 HPF cells plated for 11 days on dynamic HMW HA hydrogels, and 4) 72 HPF cells plated for 11 days on static 11 kPa PA hydrogels. Numbering indicated on video.

**Supplementary Video 2:** *Calcium Imaging for Cells on Dynamic and Static Hydrogels After 11 Days of Chronic Exposure to AKT or GSK3 $\beta$  Inhibitors.*

Representative cells undergoing calcium imaging shown in four culture conditions of 72 HPF cells plated for 11 days on dynamic HMW HA hydrogels that had been treated with 1) MK-2206 or 3) CHIR-99021. The latter two cells were 72 HPF cells plated for 11 days on static 11 kPa PA hydrogels that had been chronically treated with 2) MK-2206 or 4) CHIR-99021. Numbering indicates on video.
